# Supplementary material for: Thermal regime of High Arctic tundra ponds, Nanuit Itillinga (Polar Bear Pass), Nunavut, Canada
Source: Copernicus journal article supplement (doi:10.5194/hess-28-3931-2024), 2024-08-28
Supplement: Supplementary file 1 [file hess-28-3931-2024-supplement.pdf]

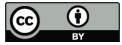

*Supplement of*

## **Thermal regime of High Arctic tundra ponds, Nanuit Itillinga (Polar Bear Pass), Nunavut, Canada**

**Kathy L. Young and Laura C. Brown**

*Correspondence to:* Laura C. Brown (lc.brown@utoronto.ca)

The copyright of individual parts of the supplement might differ from the article licence.

**Supplementary Table S1: Summary of pond site location, pond surface area, and water level (WL) (2007: ~June 18-Aug. 1; 2008: ~June 2-Aug. 28; 2009: ~May 27-Sept. 2; 2010: ~May 17-Aug 2). Frost table (FT) refers to the maximum frost table for the season or the frost table depth for the period specified in the Table. More details can be found in Croft (2011) and Abnizova (2013)**

|                                   | Pond1   | Pond2   | Pond3   | Pond4   | Pond5   | Pond6   | Pond7   | Pond8   | Pond9                   | Pond10        |
|-----------------------------------|---------|---------|---------|---------|---------|---------|---------|---------|-------------------------|---------------|
| Coordinates                       | 75° 43' | 75° 43' | 75° 43' | 75° 43' | 75° 43' | 75° 43' | 75° 43' | 75° 43' | 75° 42'                 | 75° 42'       |
|                                   | 30.50"  | 30.82"  | 26.67"  | 28.71"  | 27.24"  | 27.24"  | 23.72"  | 27.24"  | 42.74"                  | 40.50"        |
|                                   | 98° 25' | 98° 25' | 98° 25' | 98° 25' | 98° 25' | 98° 25' | 98° 25' | 98° 25' | 98° 26'                 | 98° 26'       |
|                                   | 53.83"  | 54.60"  | 59.99"  | 33.49"  | 28.71"  | 28.71"  | 26.76"  | 14.45"  | 32.93"                  | 27.14"        |
| Surface area (m <sup>2</sup> )    | 6375    | 275     | 7975    | 750     | 1850    | 1850    | 10950   | 1000    | 5200                    | 6475          |
| <b>2007</b>                       |         |         |         |         |         |         |         |         |                         |               |
| WL (mm)                           | 344     | 415     | 359     | 265     | 243     | 176     | 177     | 68      | 99                      | 123           |
| FT (mm)                           | -635    | -410    | -645    | -475    | -310    | -710    | -650    | -595    | -851                    | -432          |
| $\beta^*$                         | 0.10    | 0.08    | 0.11    | 0.08    | 0.05    | 0.11    | 0.10    | 0.10    | -                       | -             |
| Soil Colour                       | -       | -       | -       | -       | Gray    | Gray    | Gray    | Gray    | Very Dark Grayish Brown | Grayish Brown |
| % Organics                        | 1.65    | -       | -       | -       | 2.37    | -       | 1.49    | 1.9     | 10.9                    | 3.42          |
| <b>2008</b>                       |         |         |         |         |         |         |         |         |                         |               |
| WL (mm)                           | 302     | 382     | 347     | 215     | 247     | 107     | 162     | 80      | -                       | 58            |
| FT (mm)                           | -731    | -569    | -738    | -544    | -580    | -814    | -745    | -675    | -                       | -529          |
| $\beta^*$                         | 0.11    | 0.07    | 0.10    | 0.07    | 0.07    | 0.10    | 0.09    | 0.08    | -                       | 0.07          |
| <b>2009</b>                       |         |         |         |         |         |         |         |         |                         |               |
| WL (mm)                           | 348     | 433     | 348     | 236     | 200     | 195     | 171     | 158     | 286                     | 103           |
| FT (mm)                           | -689    | -489    | -644    | -534    | -524    | -707    | -680    | -631    | -408                    | -659          |
| $\beta^*$                         | 0.08    | 0.06    | 0.08    | 0.06    | 0.06    | 0.09    | 0.08    | 0.08    | -                       | 0.08          |
| Bulk Density (g/cm <sup>3</sup> ) | 1.87    | 2.10    | 2.27    | 1.83    | -       | 1.82    | -       | 1.81    | -                       | 2.28          |
| Porosity (%)                      | 22      | 25      | 17      | 25      | -       | 14      | -       | 13      | -                       | 11            |
| <b>2010</b>                       |         |         |         |         |         |         |         |         |                         |               |
| WL (mm)                           | 334     | 456     | 373     | 270     | 266     | 152     | 195     | 178     | 275                     | 114           |
| FT (mm)                           | -649    | -502    | -632    | -492    | -512    | -702    | -678    | -529    | -334                    | -428          |
| $\beta^*$                         | 0.10    | 0.08    | 0.09    | 0.07    | 0.08    | 0.11    | 0.10    | 0.10    | -                       | 0.07          |

Table S1-continued

|                                      | Pond11                                | Pond12                               | Pond13                               | Creek<br>Pond1                       | Creek<br>Pond2                         | Meadow<br>Pond                      | Pingo<br>Pond                          |
|--------------------------------------|---------------------------------------|--------------------------------------|--------------------------------------|--------------------------------------|----------------------------------------|-------------------------------------|----------------------------------------|
| Coordinates                          | 75° 43'<br>33.86"<br>98° 24'<br>8.66" | 75°43'<br>26.91"<br>98°22'<br>59.49" | 75°43'<br>26.91"<br>98°22'<br>59.49" | 75°43'<br>23.08"<br>98°26'<br>33.74" | 75° 43'<br>22.08"<br>98° 22'<br>50.65" | 75°43'<br>34.92"<br>98°31'<br>2.89" | 75° 43'<br>36.14"<br>98° 31'<br>29.93" |
| Surface area<br>(m <sup>2</sup> )    | 550                                   | 10475                                | 1725                                 | 650                                  | 1250                                   | 10666                               | 726                                    |
| <b>2007</b>                          |                                       |                                      |                                      |                                      |                                        |                                     |                                        |
| WL (mm)                              | 132                                   | –                                    | –                                    | –                                    | –                                      | –                                   | –                                      |
| FT (mm)                              | -555                                  | –                                    | –                                    | –                                    | –                                      | –                                   | –                                      |
| Soil Colour                          | Light<br>Brownish<br>Gray             | Olive<br>Gray                        | Dark<br>Gray                         | –                                    | –                                      | –                                   | –                                      |
| % Organics                           | 5.54                                  | 3.03                                 | 2.92                                 | –                                    | –                                      | –                                   | –                                      |
| <b>2008</b>                          |                                       |                                      |                                      |                                      |                                        |                                     |                                        |
| WL (mm)                              | 141                                   | 168                                  | 236                                  | 202                                  | 196                                    | 273                                 | 149                                    |
| FT (mm)                              | -863                                  | -951                                 | -819                                 | -550                                 | -698                                   | -388                                | -582                                   |
| $\beta^*$                            | 0.09                                  | 0.12                                 | 0.11                                 | 0.08                                 | 0.09                                   | 0.06                                | 0.06                                   |
| <b>2009</b>                          |                                       |                                      |                                      |                                      |                                        |                                     |                                        |
| WL (mm)                              | 243                                   | 256                                  | 303                                  | 261                                  | 215                                    | 525                                 | 380                                    |
| FT (mm)                              | -825                                  | -903                                 | -882                                 | -544                                 | -612                                   | -307                                | -252                                   |
| $\beta^*$                            | 0.10                                  | 0.11                                 | 0.10                                 | 0.07                                 | 0.08                                   | 0.04                                | 0.03                                   |
| Bulk Density<br>(g/cm <sup>3</sup> ) | 1.01                                  | 1.53                                 | 1.83                                 | 1.87                                 | 2.31                                   | –                                   | –                                      |
| Porosity (%)                         | 15                                    | 26                                   | 13                                   | 45                                   | 16                                     | –                                   | –                                      |
| <b>2010</b>                          |                                       |                                      |                                      |                                      |                                        |                                     |                                        |
| WL (mm)                              | 247                                   | 193                                  | 254                                  | 328                                  | 172                                    | 525                                 | 435                                    |
| FT (mm)                              | -810                                  | -661                                 | -534                                 | -502                                 | -609                                   | -294                                | -211                                   |
| $\beta^*$                            | 0.13                                  | –                                    | –                                    | 0.07                                 | 0.09                                   | 0.05                                | 0.03                                   |

Table S1-Continued

|                                      | East<br>Small<br>Pond                | East<br>Med.<br>Pond                 | East<br>Large<br>Pond                 | South<br>Small<br>Pond                 | South<br>Med.<br>Pond                  | South<br>Large<br>Pond                 | West<br>Small<br>Pond                  | West<br>Med.<br>Pond                   | West<br>Large<br>Pond                  |
|--------------------------------------|--------------------------------------|--------------------------------------|---------------------------------------|----------------------------------------|----------------------------------------|----------------------------------------|----------------------------------------|----------------------------------------|----------------------------------------|
| Coordinates                          | 75° 44'<br>6.01"<br>98° 5'<br>42.73" | 75° 44'<br>4.80"<br>98° 5'<br>28.15" | 75° 44'<br>10.01"<br>98° 5'<br>31.62" | 75° 41'<br>50.93"<br>98° 20'<br>49.33" | 75° 41'<br>51.36"<br>98° 20'<br>40.83" | 75° 41'<br>47.19"<br>98° 20'<br>28.74" | 75° 42'<br>20.53"<br>98° 45'<br>18.70" | 75° 42'<br>25.24"<br>98° 45'<br>17.19" | 75° 42'<br>21.47"<br>98° 45'<br>29.00" |
| Surface area<br>(m <sup>2</sup> )    | 100                                  | 1500                                 | 24500                                 | 350                                    | 2075                                   | 3575                                   | 2550                                   | 7050                                   | 31400                                  |
| <b>2007</b> (July 26-<br>Aug. 2)     |                                      |                                      |                                       |                                        |                                        |                                        |                                        |                                        |                                        |
| WL (mm)                              | 70                                   | 110                                  | 125                                   | –                                      | –                                      | –                                      | 60                                     | 100                                    | 130                                    |
| FT (mm)                              | -460                                 | -740                                 | -760                                  | –                                      | –                                      | –                                      | -885                                   | -1088                                  | -1020                                  |
| Soil Colour                          | Gray                                 | Gray                                 | Light<br>Brownish<br>Gray             | –                                      | –                                      | –                                      | –                                      | Light<br>Olive<br>Gray                 | –                                      |
| % Organics                           | 3.26                                 | 5.1                                  | 1.06                                  | –                                      | –                                      | –                                      | –                                      | 1.42                                   | –                                      |
| <b>2008</b> (Aug.<br>26-Sept 1-fall) |                                      |                                      |                                       |                                        |                                        |                                        |                                        |                                        |                                        |
| WL (mm)                              | 135                                  | 222                                  | 275                                   | 180                                    | 400                                    | 328                                    | 261                                    | 150                                    | 262                                    |
| FT (mm)                              | -556                                 | -648                                 | -588                                  | -675                                   | -653                                   | -443                                   | -527                                   | -852                                   | -893                                   |
| <b>2009</b> (Aug. 3-<br>5) Summer    |                                      |                                      |                                       |                                        |                                        |                                        |                                        |                                        |                                        |
| WL (mm)                              | 270                                  | 290                                  | 245                                   | 410                                    | 330                                    | 381                                    | 340                                    | 268                                    | 350                                    |
| FT (mm)                              | -921                                 | -603                                 | -625                                  | -386                                   | -323                                   | -492                                   | -677                                   | -713                                   | -876                                   |
| <b>2009</b> (Aug.<br>26-30)-Fall     |                                      |                                      |                                       |                                        |                                        |                                        |                                        |                                        |                                        |
| WL (mm)                              | 260                                  | 294                                  | 223                                   | –                                      | –                                      | –                                      | 406                                    | 222                                    | 446                                    |
| FT (mm)                              | -968                                 | -948                                 | -1020                                 | –                                      | –                                      | –                                      | -618                                   | -959                                   | -798                                   |
| <b>2010</b> (June 19-<br>24)-Spring  |                                      |                                      |                                       |                                        |                                        |                                        |                                        |                                        |                                        |
| WL (mm)                              | 198                                  | 165                                  | 104                                   | 425                                    | 456                                    | 284                                    | 228                                    | 188                                    | 195                                    |
| FT (mm)                              | -15                                  | -23                                  | -20                                   | 0                                      | -6                                     | -30                                    | -75                                    | -68                                    | -30                                    |

\* $\beta$ , a coefficient is determined after Woo (1983), where  $Z_f = \beta(t^{0.5})$ . Here  $Z_f$  is the depth to the frost table (taken here as the Max FT),  $t$  is time in days after the initial thaw period. Others (e.g., Qingbai et al., 2015) have referred to  $\beta$  as the *Edaphic Factor* or *scaling parameter*, which considers soil characteristics such as thermal conductivity, bulk density, soil water content, and latent heat of fusion. Qingbai et al. (2015) also used cumulative degree-days for  $t$  instead of days since ground thaw.

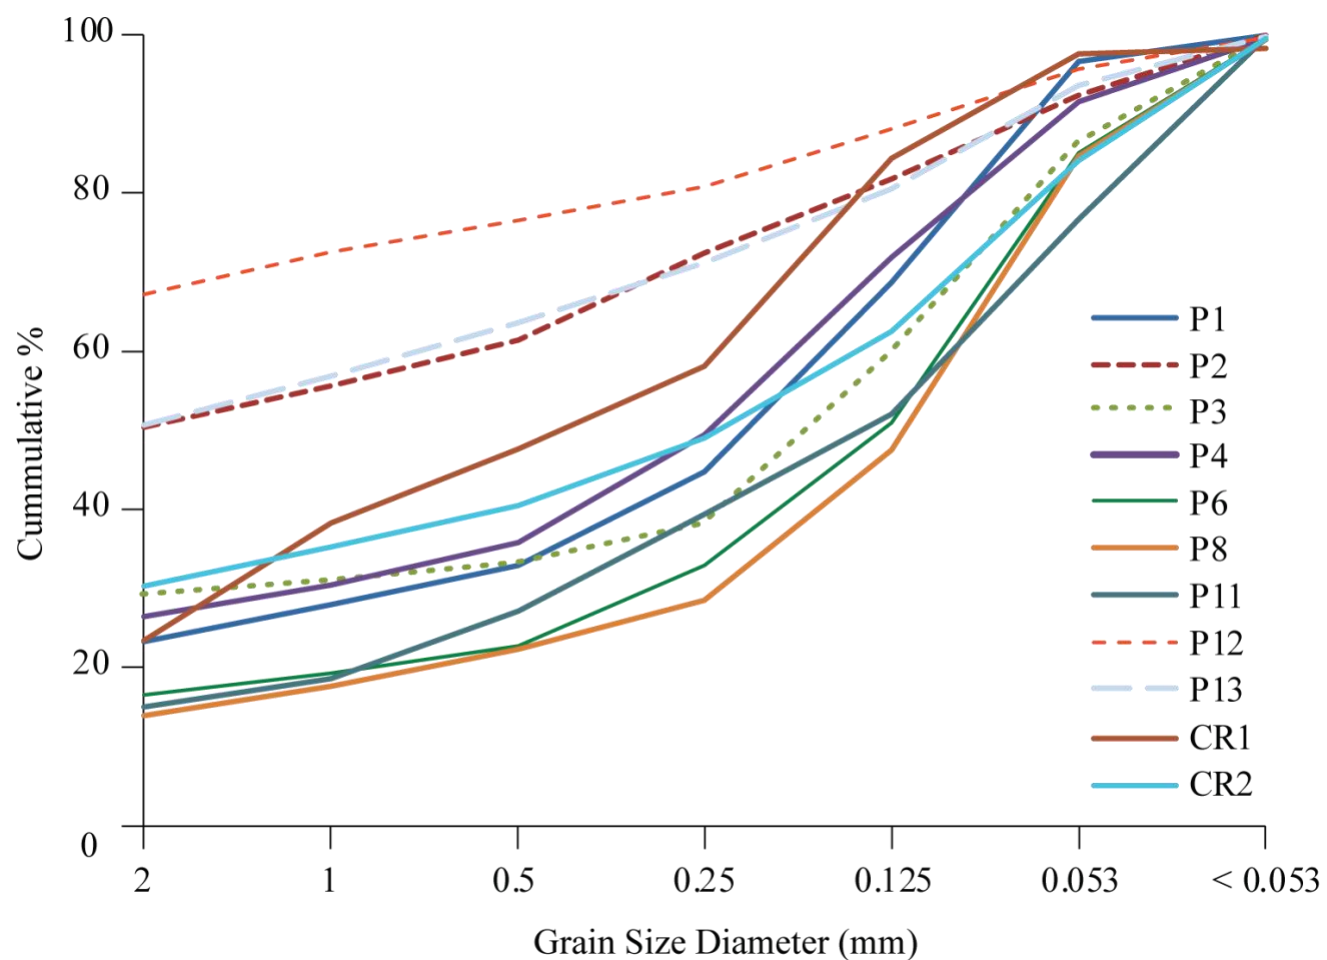

Supplementary Figure S1. Grain size analysis of selected centrally located ponds at PBP. Pond sediments reported here were collected in 2009 (see Croft 2011).

**References:**

Qingbai, W., Yandong, H., Hanbo, Y., and Yongzhi, L.: Changes in active-layer thickness and near-surface permafrost between 2002 and 2012 in alpine ecosystems, Qinghai- Xizang (Tibet) Plateau, China, *Global Planet. Change*, 124, 149–155, 2015.

Woo, M. K.: Hydrology of a drainage basin in the Canadian High Arctic, *Ann. Assoc. Am. Geogr.*, 73, 577–596, 1983.
